# Supplementary material for: Neural-ODE for pharmacokinetics modeling and its advantage to alternative machine learning models in predicting new dosing regimens
Source: PubMed Central journal article supplement — iScience. 2021 Jun 30;24(7):102804. doi: 10.1016/j.isci.2021.102804 (PMC8283337; doi:10.1016/j.isci.2021.102804), 2021-06-30
Supplement: mmc1.pdf [file mmc1.pdf]

**iScience, Volume 24**

**Supplemental information**

**Neural-ODE for pharmacokinetics modeling  
and its advantage to alternative machine learning  
models in predicting new dosing regimens**

**James Lu, Kaiwen Deng, Xinyuan Zhang, Gengbo Liu, and Yuanfang Guan**

**Figure S1. Comparison of Q1W and Q3W data of TDM1. Related to Table 1 and Results.** a. The number of patients is bigger in Q3W than in Q1W. b. Total length of treatment. c. Number of PK records for each individual. d. Amount of dosing is higher in Q3W than in Q1W.

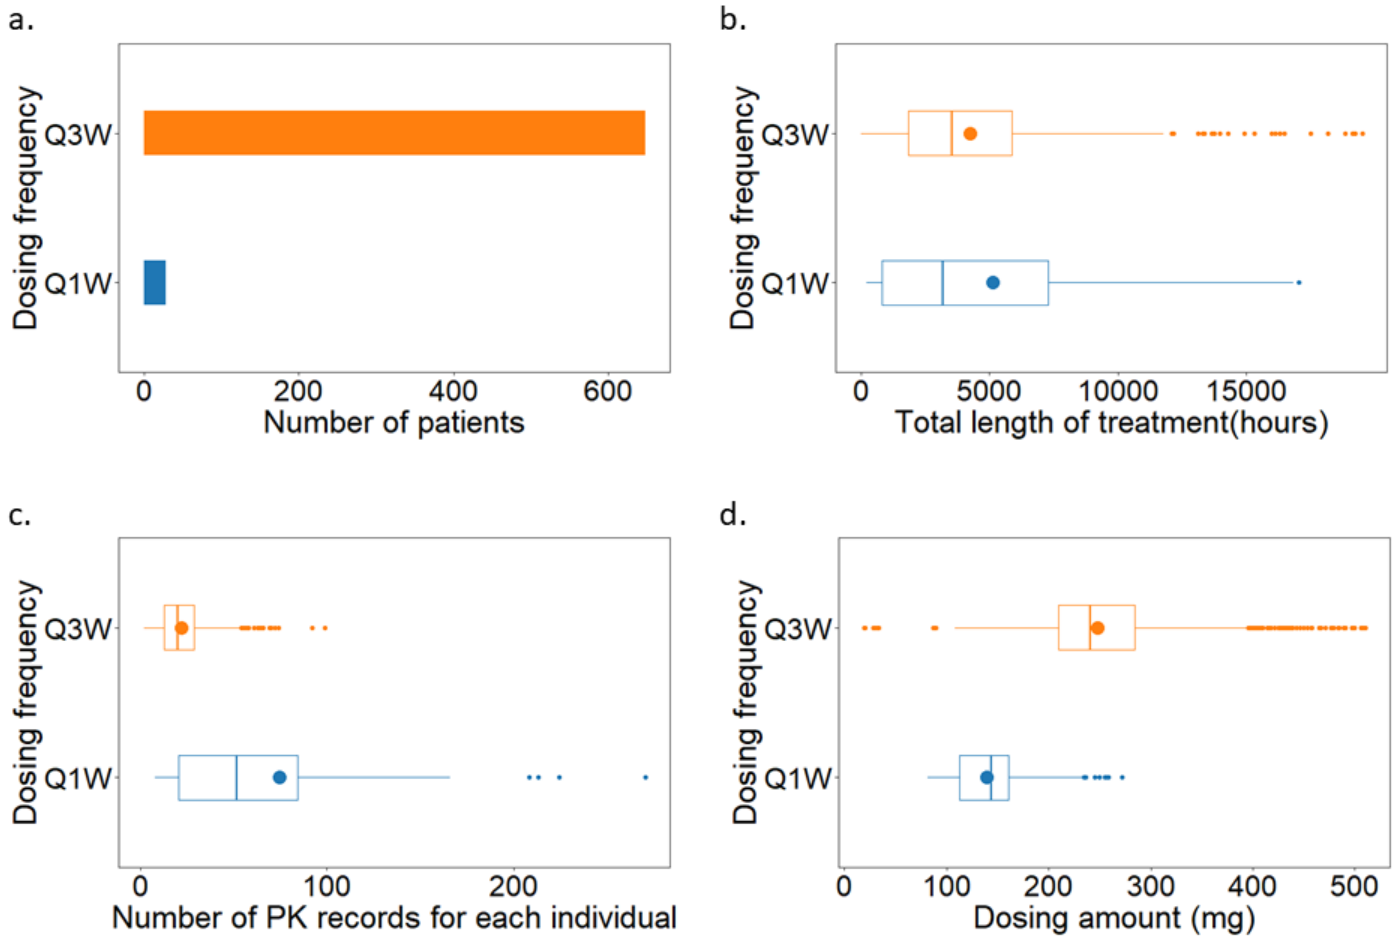

**Figure S2. Example of patient #5409. Related to Figure 4.** a. visualization of interpolated prediction points for patient #5409. b. we artificially stopped dosing after 2500 hours and used the trained models to predict PK values. c. we artificially stopped both dosing and TIME after 2500 hours for patient #5409 and used the trained models to predict PK values.

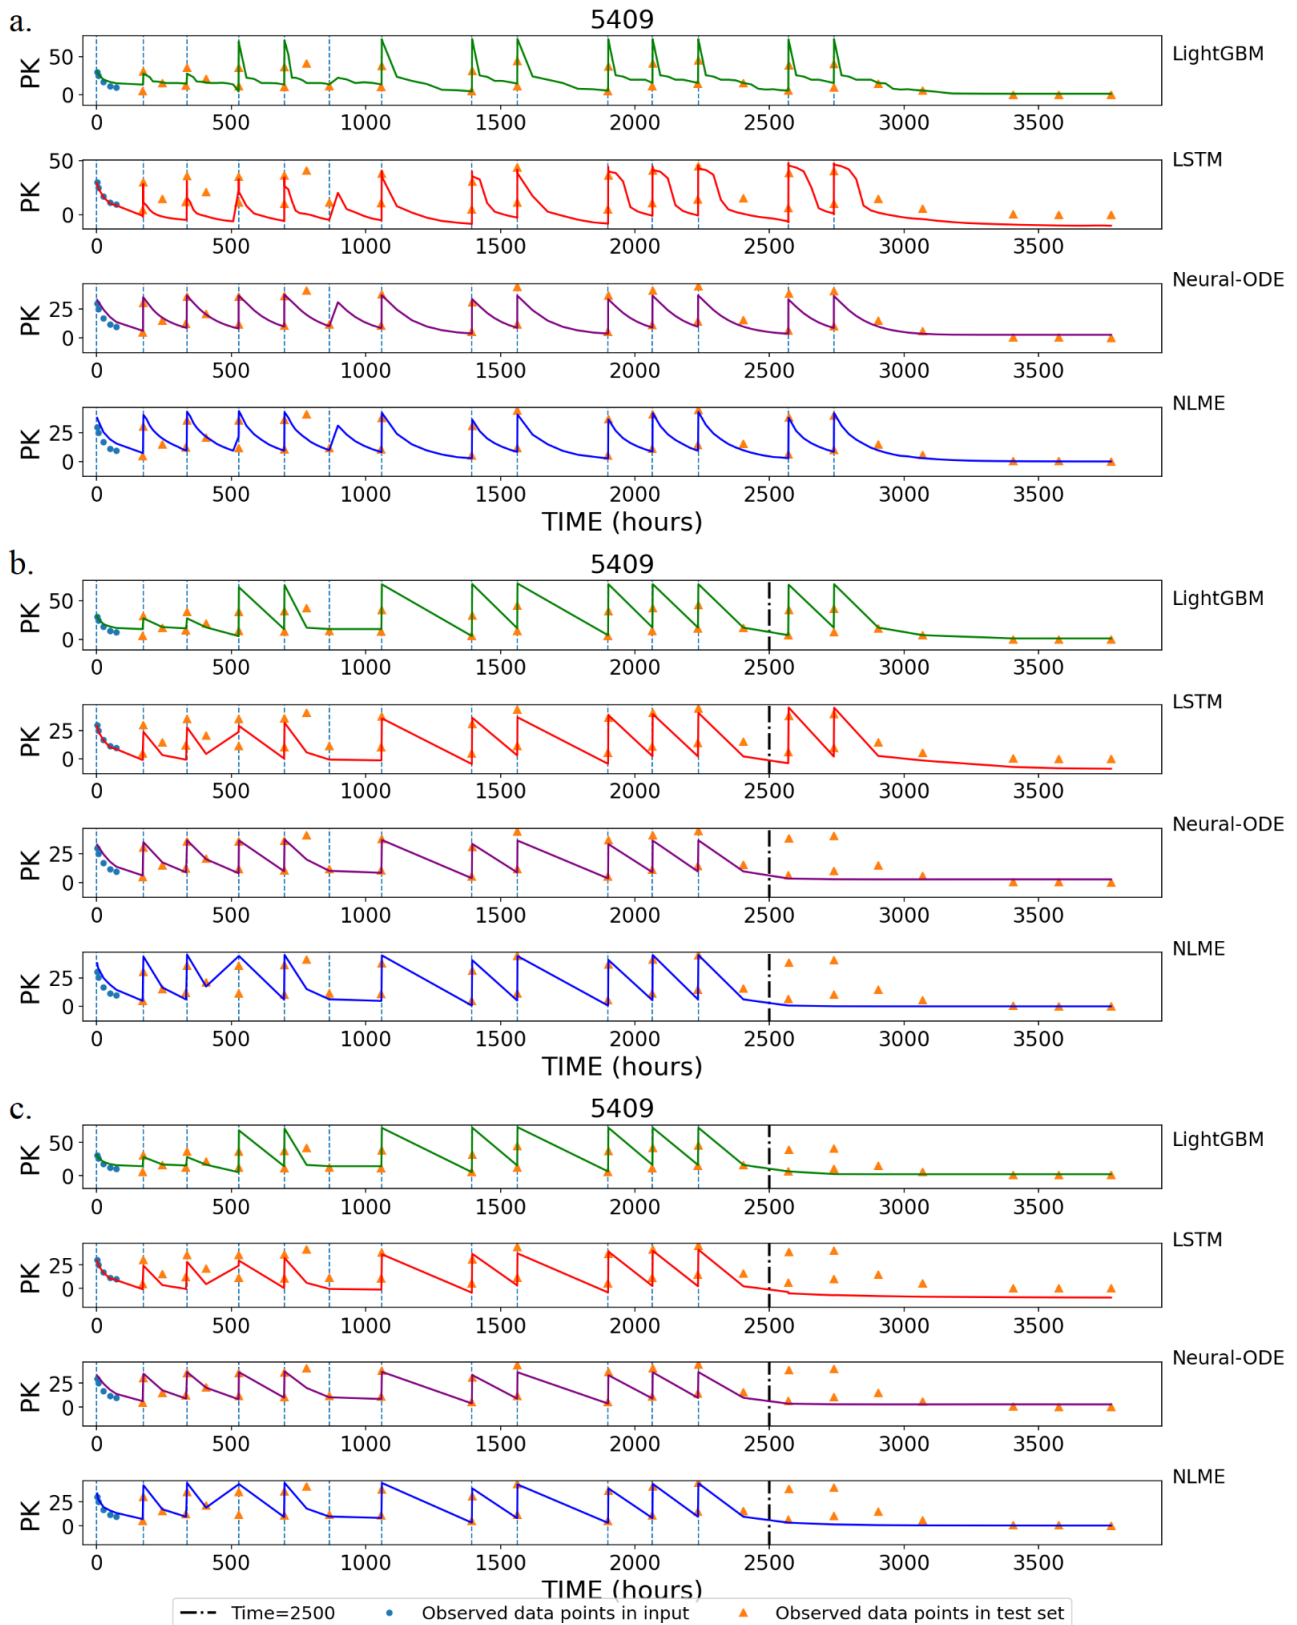

**Figure S3. Example of patient #5412. Related to Figure 4.** a. visualization of interpolated prediction points for patient #5412. b. we artificially stopped dosing after 2500 hours and used the trained models to predict PK values. c. we artificially stopped both dosing and TIME after 2500 hours for patient #5412 and used the trained models to predict PK values.

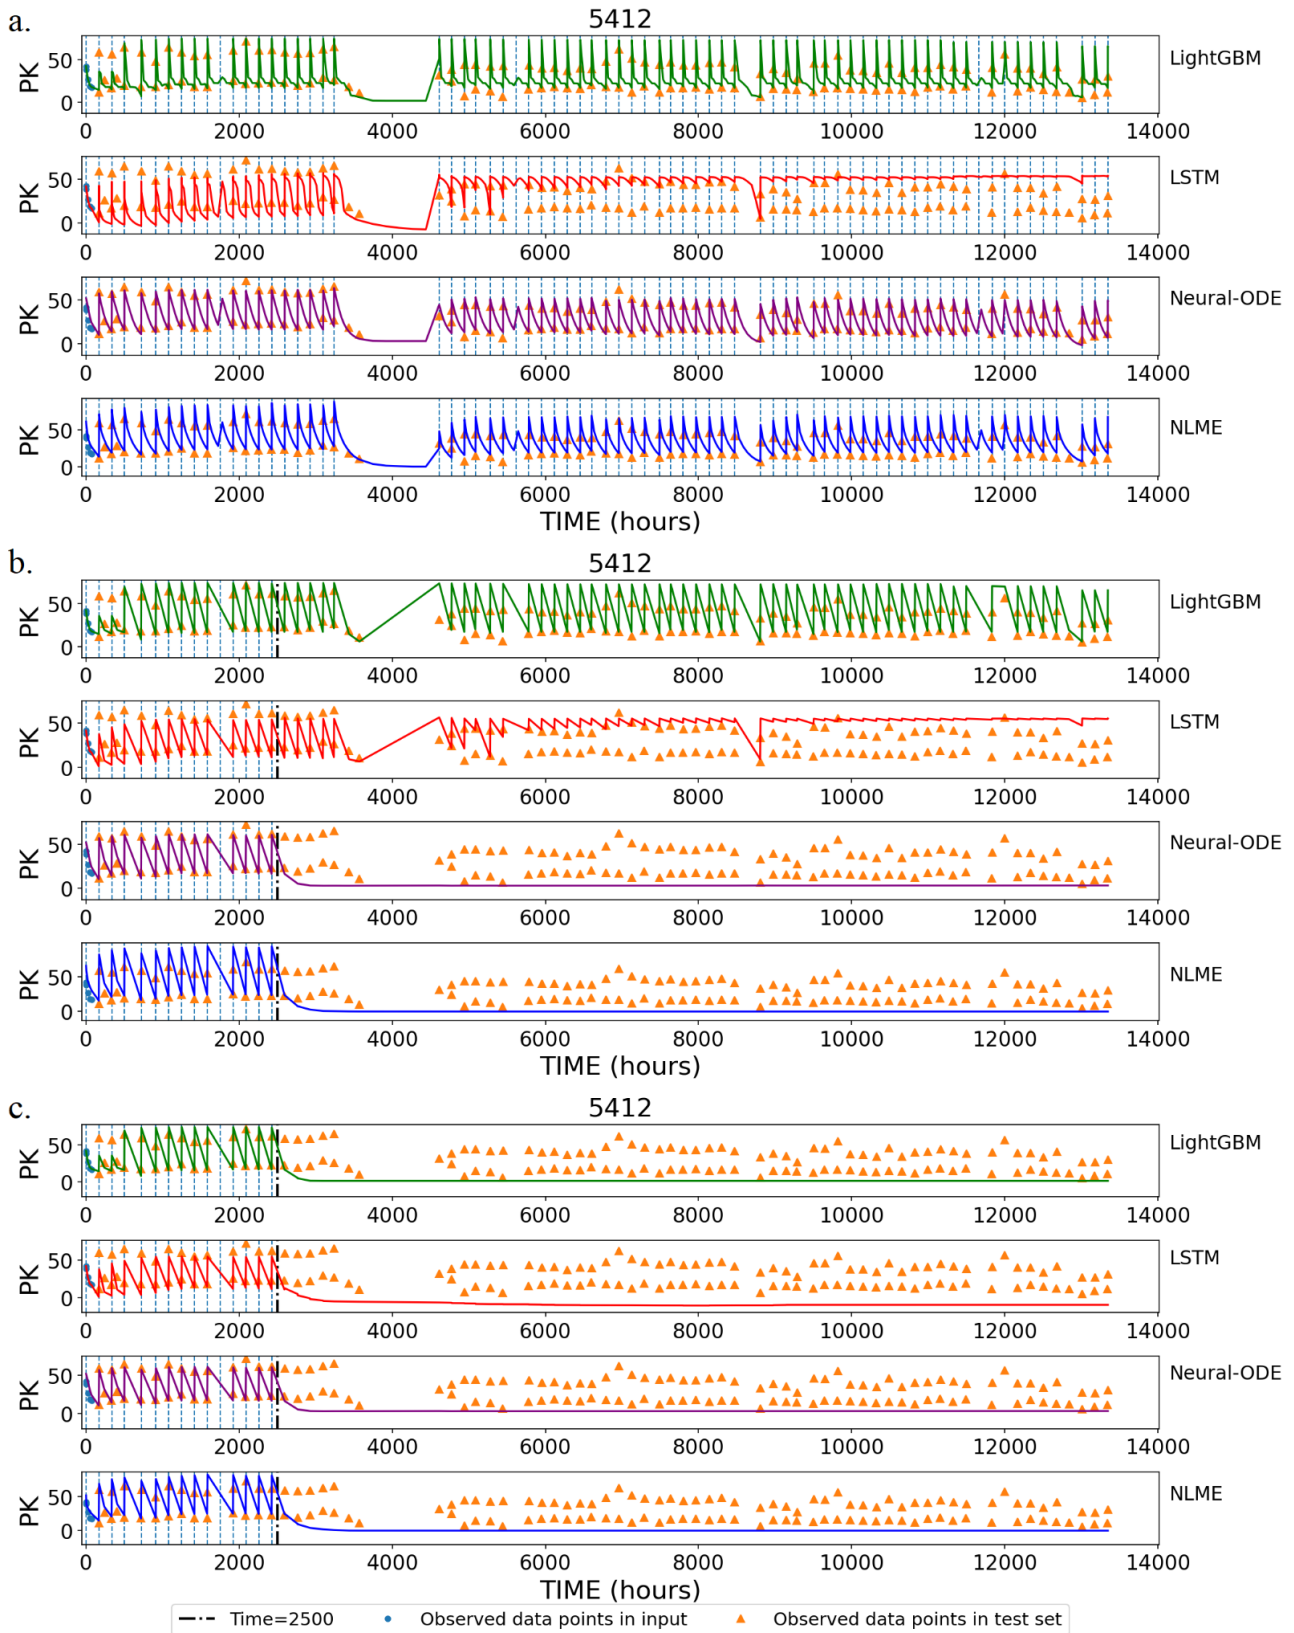

**Figure S4. Example of patient #5414. Related to Figure 4.** a. visualization of interpolated prediction points for patient #5414. b. we artificially stopped dosing after 2500 hours and used the trained models to predict PK values. c. we artificially stopped both dosing and TIME after 2500 hours and used the trained models to predict PK values.

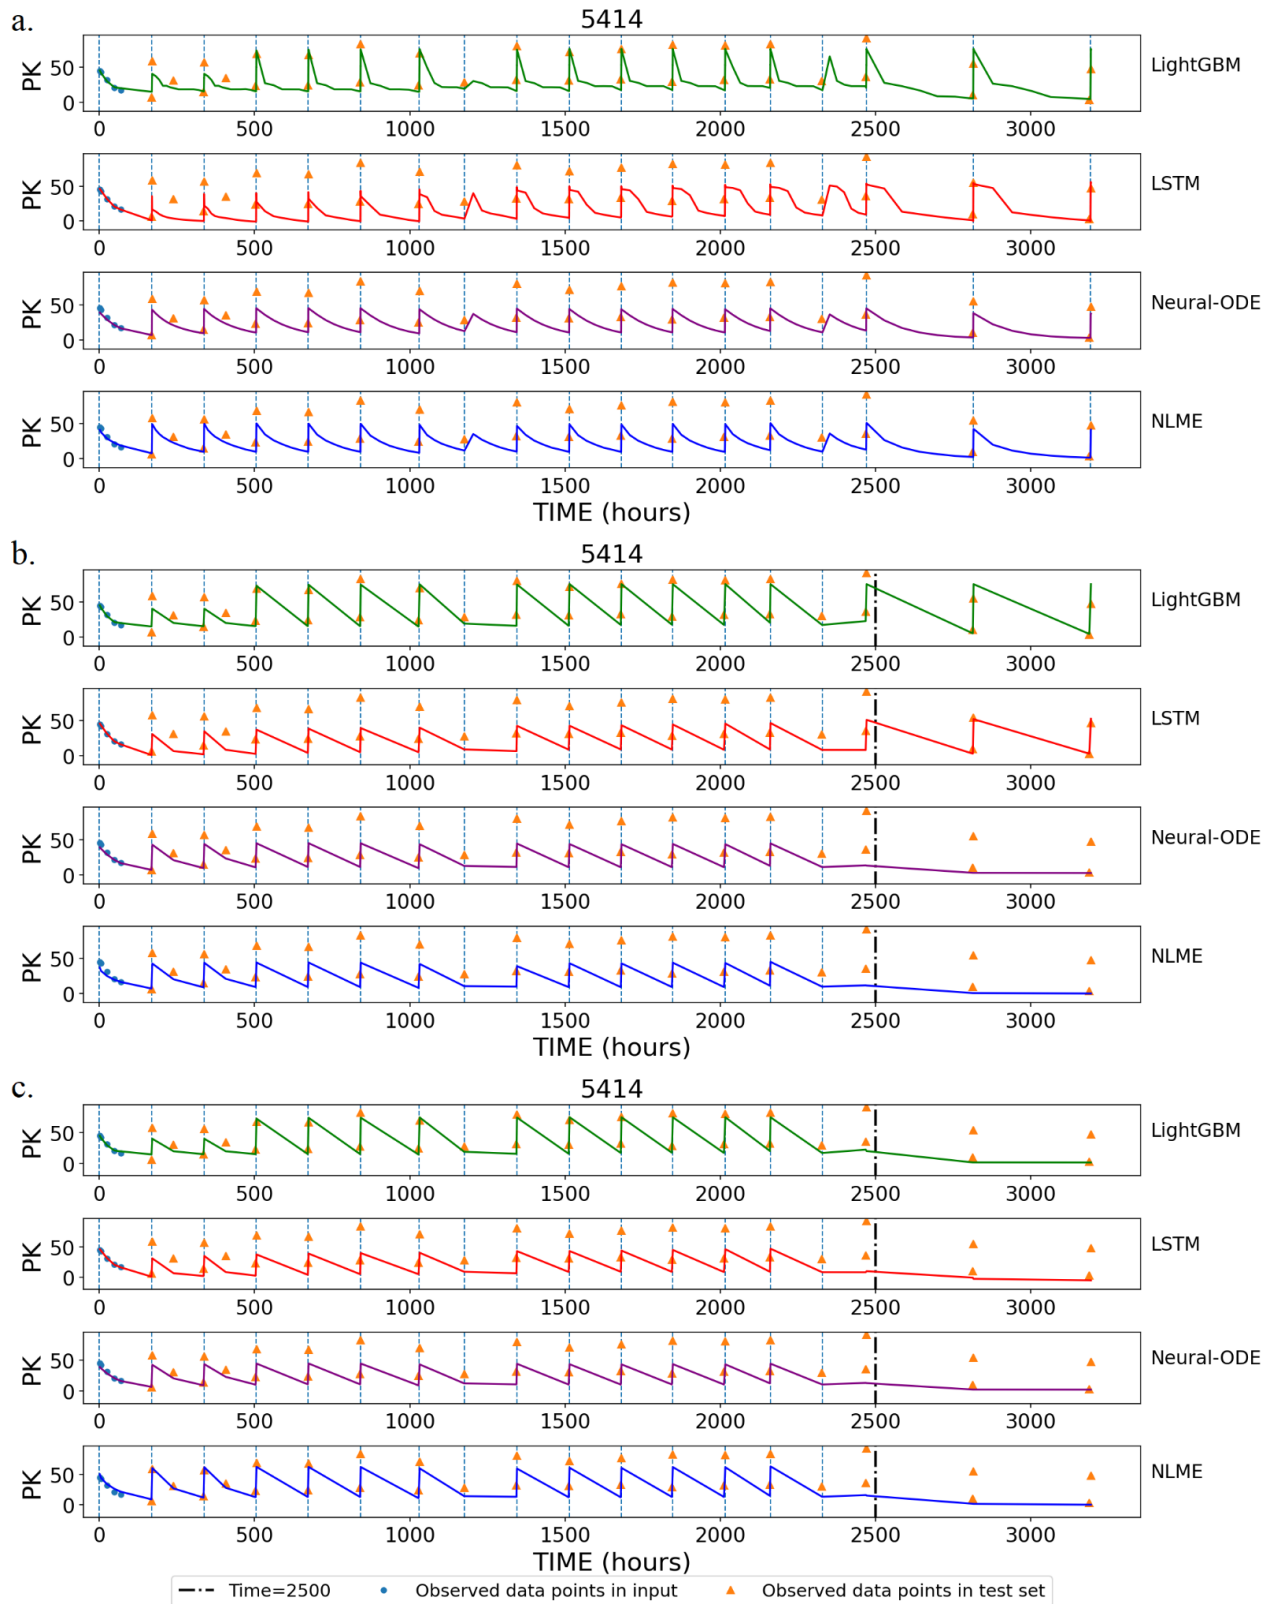

**Table S1. Parameters used for initializing the NLME model. Related to Figure 3.**

| Parameter  | Parameter Description             | Initial estimates | Boundaries(lower, upper; if defined) |    |
|------------|-----------------------------------|-------------------|--------------------------------------|----|
| $k_a$      | Absorption rate constant          | 1.14              | --                                   | -- |
| CL         | Elimination clearance             | -3.57             | -5                                   | -1 |
| Q          | Distribution clearance            | 1.14              | -1                                   | 3  |
| $V_2$      | Central volume of distribution    | -0.454            | -2                                   | 2  |
| $V_3$      | Peripheral volume of distribution | -2.87             | -5                                   | -1 |
| ETA. $k_a$ | Variability in $k_a$              | 0.1               | --                                   | -- |
| ETA.CL     | Variability in CL                 | 0.1               | --                                   | -- |
| ETA.Q      | Variability in Q                  | 0.1               | --                                   | -- |
| ETA. $V_2$ | Variability in $V_2$              | 0.1               | --                                   | -- |
| ETA. $V_3$ | Variability in $V_3$              | 2                 | --                                   | -- |
| $\sigma$   | Additive residual error           | 0.1               | --                                   | -- |

**Table S2. Bootstrap hypothesis test p-values for cross-regimen model performances and five fold model performances. Related to Figure 3.**

|                                | Models                  | RMSE    | R2 score | Pearson's correlation |
|--------------------------------|-------------------------|---------|----------|-----------------------|
| Cross-regimen bootstrap result | Neural-ODE vs. LightGBM | <1e-05  | 0.00014  | <1e-05                |
|                                | Neural-ODE vs. LSTM     | 0.00071 | 0.00206  | <1e-05                |
|                                | Neural-ODE vs. NLME     | 0.00011 | 0.00046  | 3e-05                 |
| Five fold bootstrap result     | Neural-ODE vs. LightGBM | 0.44788 | 0.42895  | 0.42302               |
|                                | Neural-ODE vs. LSTM     | 0.69927 | 0.68677  | 0.80843               |
|                                | Neural-ODE vs. NLME     | <1e-05  | <1e-05   | <1e-05                |

**Table S3. NLME Model estimated parameters (cross-regimen model 1). Related to Figure 3.**

|         | Estimate | SE      | %RSE      | Back-transformed | CI Lower | CI Upper | BSV(CV%)  | Shrink(SD)% |
|---------|----------|---------|-----------|------------------|----------|----------|-----------|-------------|
| tka     | 1.28638  | 0.05825 | 4.5284    | 3.61967          | 3.22912  | 4.05745  | 98.67719  | 37.85645    |
| tcl     | -3.61554 | 0.01183 | 0.32731   | 0.0269           | 0.02629  | 0.02753  | 14.74115  | 47.38994    |
| tv2     | 0.92935  | 0.01184 | 1.2736    | 2.53286          | 2.47478  | 2.5923   | 18.31932  | 27.59139    |
| tv3     | 0.03275  | 0.06497 | 198.36617 | 1.03329          | 0.90975  | 1.17361  | 99.6739   | 50.30319    |
| tq      | -1.31828 | 0.1002  | 7.6009    | 0.2676           | 0.21988  | 0.32566  | 219.17092 | 49.89933    |
| add.err | 8.34765  | NA      | NA        | 8.34765          | NA       | NA       | NA        | NA          |



**Figure S5. VPC for cross-regimen model 1. Related to Figure 3.** Black points are original observations. Red line is the predicted median. Blue shaded areas represent intervals around 5th and 95th percentiles.

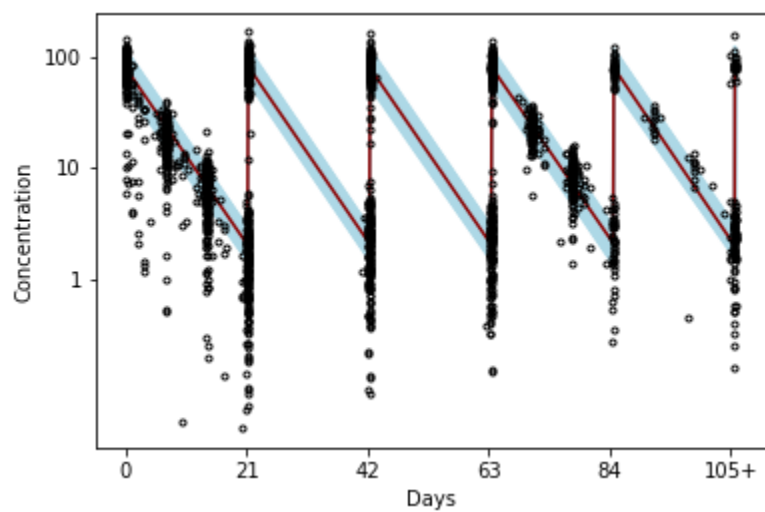

**Table S4. NLME Model estimated parameters (cross-regimen model 2). Related to Figure 3.**

|         | Estimate | SE      | %RSE    | Back-transformed | CI Lower | CI Upper | BSV(CV%)  | Shrink(SD)% |
|---------|----------|---------|---------|------------------|----------|----------|-----------|-------------|
| tka     | 1.3263   | 0.05874 | 4.42924 | 3.76707          | 3.35738  | 4.22676  | 102.49442 | 37.84547    |
| tcl     | -3.61554 | 0.01154 | 0.31917 | 0.0269           | 0.0263   | 0.02752  | 13.50572  | 49.27309    |
| tv2     | 0.93829  | 0.01083 | 1.15429 | 2.5556           | 2.50192  | 2.61043  | 17.85565  | 29.10447    |
| tv3     | 0.10606  | 0.06145 | 57.935  | 1.11189          | 0.98573  | 1.2542   | 88.9007   | 51.81202    |
| tq      | -1.54266 | 0.10403 | 6.74325 | 0.21381          | 0.17437  | 0.26217  | 315.2457  | 49.06409    |
| add.err | 8.36423  | NA      | NA      | 8.36423          | NA       | NA       | NA        | NA          |

**Figure S6. VPC for cross-regimen model 2. Related to Figure 3.**

Black points are original observations. Red line is the predicted median. Blue shaded areas represent intervals around 5th and 95th percentiles.

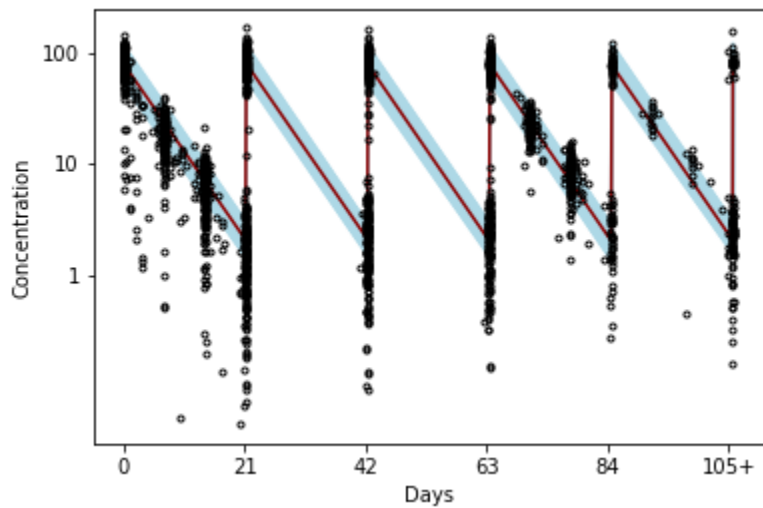

**Table S5. NLME Model estimated parameters (cross-regimen model 3). Related to Figure 3.**

|         | Estimate | SE      | %RSE      | Back-transformed | CI Lower | CI Upper | BSV(CV%)  | Shrink(SD)% |
|---------|----------|---------|-----------|------------------|----------|----------|-----------|-------------|
| tka     | 1.3855   | 0.06268 | 4.52432   | 3.9968           | 3.53473  | 4.51929  | 109.51242 | 38.98178    |
| tcl     | -3.61817 | 0.01178 | 0.32545   | 0.02683          | 0.02622  | 0.02746  | 14.4661   | 47.58632    |
| tv2     | 0.94138  | 0.01101 | 1.16936   | 2.56351          | 2.5088   | 2.61942  | 18.39322  | 26.50099    |
| tv3     | -0.01032 | 0.06791 | 657.76323 | 0.98973          | 0.86638  | 1.13064  | 104.44421 | 50.70264    |
| tq      | -1.42984 | 0.09956 | 6.96319   | 0.23935          | 0.19692  | 0.29092  | 244.34299 | 51.73622    |
| add.err | 8.35516  | NA      | NA        | 8.35516          | NA       | NA       | NA        | NA          |

**Figure S7. VPC for cross-regimen model 3. Related to Figure 3.** Black points are original observations. Red line is the predicted median. Blue shaded areas represent intervals around 5th and 95th percentiles.

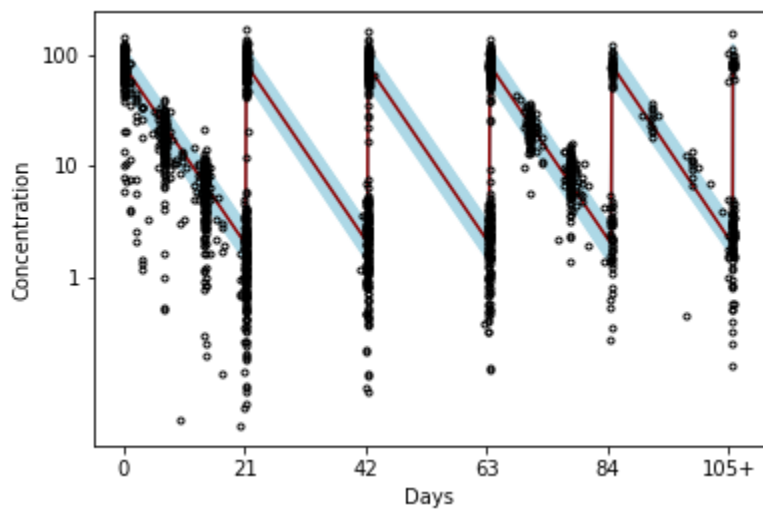

**Table S6. NLME Model estimated parameters (cross-regimen model 4). Related to Figure 3.**

|         | Estimate | SE      | %RSE     | Back-transformed | CI Lower | CI Upper | BSV(CV%)  | Shrink(SD)% |
|---------|----------|---------|----------|------------------|----------|----------|-----------|-------------|
| tka     | 1.32319  | 0.06013 | 4.544    | 3.75537          | 3.3379   | 4.22505  | 103.01655 | 38.37446    |
| tcl     | -3.61565 | 0.01158 | 0.32025  | 0.0269           | 0.0263   | 0.02752  | 13.40369  | 49.10364    |
| tv2     | 0.92985  | 0.01123 | 1.20789  | 2.53413          | 2.47896  | 2.59053  | 17.78989  | 29.10745    |
| tv3     | 0.08205  | 0.06369 | 77.62073 | 1.08551          | 0.95812  | 1.22984  | 94.00857  | 50.02921    |
| tq      | -1.39766 | 0.10167 | 7.27401  | 0.24718          | 0.20252  | 0.30168  | 275.19279 | 48.48688    |
| add.err | 8.3583   | NA      | NA       | 8.3583           | NA       | NA       | NA        | NA          |

**Figure S8. VPC for cross-regimen model 4. Related to Figure 3.** Black points are original observations. Red line is the predicted median. Blue shaded areas represent intervals around 5th and 95th percentiles.

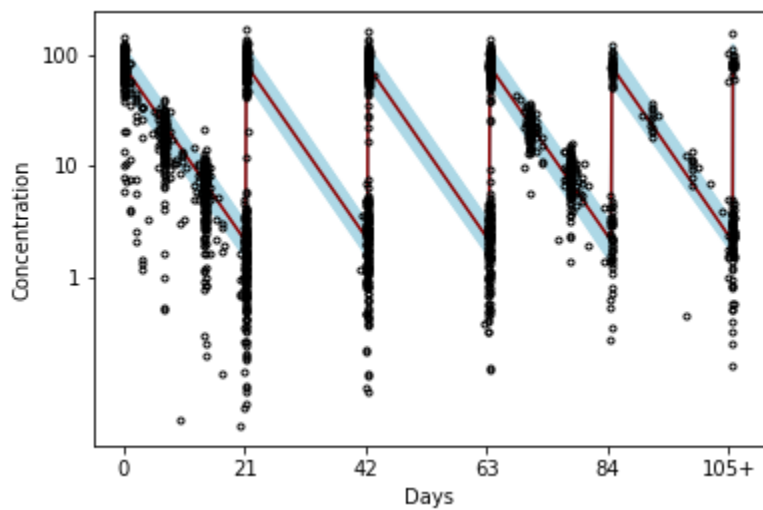

**Table S7. NLME Model estimated parameters (cross-regimen model 5). Related to Figure 3.**

|         | Estimate | SE      | %RSE      | Back-transformed | CI Lower | CI Upper | BSV(CV%)  | Shrink(SD)% |
|---------|----------|---------|-----------|------------------|----------|----------|-----------|-------------|
| tka     | 1.33949  | 0.05989 | 4.47133   | 3.81711          | 3.39432  | 4.29255  | 103.88998 | 38.135      |
| tcl     | -3.61674 | 0.0117  | 0.32355   | 0.02687          | 0.02626  | 0.02749  | 14.07063  | 48.55479    |
| tv2     | 0.93604  | 0.01098 | 1.17268   | 2.54985          | 2.49558  | 2.60531  | 17.87464  | 28.67162    |
| tv3     | 0.0567   | 0.06429 | 113.38385 | 1.05834          | 0.93304  | 1.20047  | 95.95689  | 50.72853    |
| tq      | -1.45731 | 0.10205 | 7.00234   | 0.23286          | 0.19065  | 0.28442  | 291.56843 | 49.26985    |
| add.err | 8.35534  | NA      | NA        | 8.35534          | NA       | NA       | NA        | NA          |



**Figure S9. VPC for cross-regimen model 5. Related to Figure 3.** Black points are original observations. Red line is the predicted median. Blue shaded areas represent intervals around 5th and 95th percentiles.

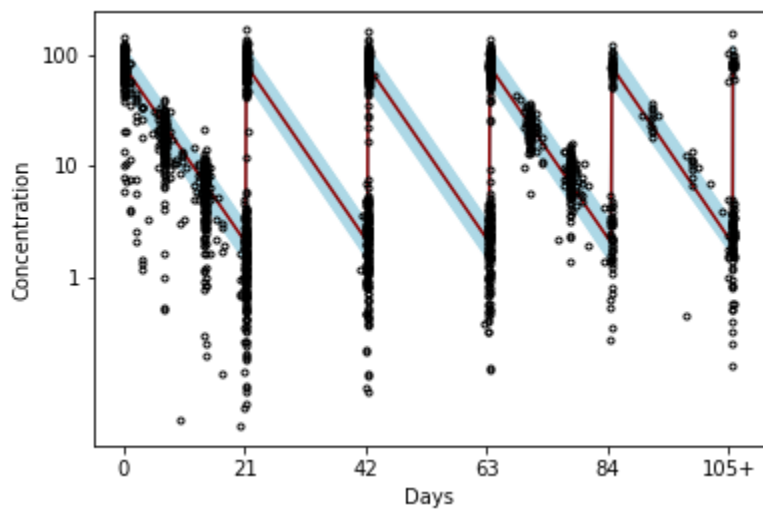

**Table S8. NLME Model estimated parameters (cross validation model 1). Related to Figure 3.**

|         | Estimate | SE      | %RSE     | Back-transformed | CI Lower | CI Upper | BSV(CV%)  | Shrink(SD)% |
|---------|----------|---------|----------|------------------|----------|----------|-----------|-------------|
| tka     | 1.18049  | 0.05714 | 4.84074  | 3.25598          | 2.91099  | 3.64186  | 88.10342  | 34.72713    |
| tcl     | -3.5966  | 0.01382 | 0.38418  | 0.02742          | 0.02668  | 0.02817  | 19.70617  | 34.69762    |
| tv2     | 0.92216  | 0.013   | 1.40938  | 2.51472          | 2.45147  | 2.5796   | 18.77901  | 27.67598    |
| tv3     | 0.21533  | 0.06211 | 28.84469 | 1.24027          | 1.09811  | 1.40083  | 84.06165  | 48.52114    |
| tq      | -1.36935 | 0.10213 | 7.45837  | 0.25427          | 0.20814  | 0.31062  | 219.85211 | 47.00075    |
| add.err | 7.90541  | NA      | NA       | 7.90541          | NA       | NA       | NA        | NA          |

**Table S9. NLME Model estimated parameters (cross validation model 2). Related to Figure 3.**

|         | Estimate | SE      | %RSE    | Back-transformed | CI Lower | CI Upper | BSV(CV%)  | Shrink(SD)% |
|---------|----------|---------|---------|------------------|----------|----------|-----------|-------------|
| tka     | 1.17028  | 0.05645 | 4.82387 | 3.22289          | 2.88531  | 3.59996  | 88.9347   | 35.24532    |
| tcl     | -3.59631 | 0.01356 | 0.37718 | 0.02742          | 0.02671  | 0.02816  | 19.18691  | 34.75084    |
| tv2     | 0.92295  | 0.01285 | 1.39215 | 2.51671          | 2.45412  | 2.58089  | 19.10322  | 27.35166    |
| tv3     | 0.25358  | 0.06049 | 23.8536 | 1.28863          | 1.14456  | 1.45082  | 80.48276  | 49.30822    |
| tq      | -1.41438 | 0.09886 | 6.98958 | 0.24308          | 0.20026  | 0.29505  | 211.88197 | 47.2265     |
| add.err | 7.90681  | NA      | NA      | 7.90681          | NA       | NA       | NA        | NA          |

**Table S10. NLME Model estimated parameters (cross validation model 3). Related to Figure 3.**

|         | Estimate | SE      | %RSE     | Back-transformed | CI Lower | CI Upper | BSV(CV%)  | Shrink(SD)% |
|---------|----------|---------|----------|------------------|----------|----------|-----------|-------------|
| tka     | 1.19894  | 0.05883 | 4.90654  | 3.3166           | 2.95543  | 3.72192  | 90.28141  | 35.86359    |
| tcl     | -3.60025 | 0.01384 | 0.38443  | 0.02732          | 0.02659  | 0.02807  | 20.11285  | 34.26278    |
| tv2     | 0.91636  | 0.01349 | 1.47223  | 2.50017          | 2.43492  | 2.56716  | 18.9299   | 28.36956    |
| tv3     | 0.14628  | 0.06557 | 44.82242 | 1.15752          | 1.01793  | 1.31625  | 92.35684  | 47.34783    |
| tq      | -1.25481 | 0.1032  | 8.22444  | 0.28513          | 0.23291  | 0.34905  | 217.40323 | 47.50185    |
| add.err | 7.89608  | NA      | NA       | 7.89608          | NA       | NA       | NA        | NA          |

**Table S11. NLME Model estimated parameters (cross validation model 4). Related to Figure 3.**

|         | Estimate | SE      | %RSE     | Back-transformed | CI Lower | CI Upper | BSV(CV%)  | Shrink(SD)% |
|---------|----------|---------|----------|------------------|----------|----------|-----------|-------------|
| tka     | 1.16318  | 0.05724 | 4.92071  | 3.20009          | 2.8605   | 3.57999  | 88.98275  | 35.30937    |
| tcl     | -3.59655 | 0.01367 | 0.3802   | 0.02742          | 0.02669  | 0.02816  | 19.30622  | 35.39027    |
| tv2     | 0.91698  | 0.01322 | 1.44204  | 2.50172          | 2.43771  | 2.5674   | 19.18084  | 27.807      |
| tv3     | 0.24603  | 0.06179 | 25.11441 | 1.27894          | 1.13306  | 1.44359  | 80.95622  | 49.1023     |
| tq      | -1.34136 | 0.09824 | 7.32426  | 0.26149          | 0.21569  | 0.31702  | 202.78248 | 46.46734    |
| add.err | 7.90487  | NA      | NA       | 7.90487          | NA       | NA       | NA        | NA          |

**Table S12. NLME Model estimated parameters (cross validation model 5). Related to Figure 3.**

|         | Estimate | SE      | %RSE     | Back-transformed | CI Lower | CI Upper | BSV(CV%)  | Shrink(SD)% |
|---------|----------|---------|----------|------------------|----------|----------|-----------|-------------|
| tka     | 1.29017  | 0.06422 | 4.97761  | 3.63341          | 3.20369  | 4.12077  | 99.54151  | 36.16112    |
| tcl     | -3.60733 | 0.01285 | 0.35633  | 0.02712          | 0.02645  | 0.02782  | 17.11329  | 39.23065    |
| tv2     | 0.93864  | 0.01203 | 1.28189  | 2.55651          | 2.49692  | 2.61751  | 18.04026  | 30.25982    |
| tv3     | 0.20424  | 0.06031 | 29.52994 | 1.2266           | 1.08984  | 1.38051  | 76.11313  | 52.89438    |
| tq      | -1.56376 | 0.11394 | 7.286    | 0.20935          | 0.16745  | 0.26173  | 350.41384 | 46.51082    |
| add.err | 8.18695  | NA      | NA       | 8.18695          | NA       | NA       | NA        | NA          |
